# Supplementary material
Source: publisher figshare collection journal article supplement (https://tandf.figshare.com/ndownloader/files/16766375)
Supplement: Supplementary file 1 [file 16766375]

**Supplementary Table 1. Ovid Medline search strategy**

| Number | Search strategy | Results |
| --- | --- | --- |
| 1 | atopic dermatitis.mp. [mp=ti, ot, ab, tx, kw, ct, sh, hw, tn, dm, mf, dv, fx, dq, nm, kf, ox, px, rx, an, ui, sy] | 65368 |
| 2 | eczema.mp. [mp=ti, ot, ab, tx, kw, ct, sh, hw, tn, dm, mf, dv, fx, dq, nm, kf, ox, px, rx, an, ui, sy] | 61303 |
| 3 | dermatitis atopic.mp. [mp=ti, ot, ab, tx, kw, ct, sh, hw, tn, dm, mf, dv, fx, dq, nm, kf, ox, px, rx, an, ui, sy] | 20924 |
| 4 | childhood eczema.mp. [mp=ti, ot, ab, tx, kw, ct, sh, hw, tn, dm, mf, dv, fx, dq, nm, kf, ox, px, rx, an, ui, sy] | 629 |
| 5 | neurodermatitis.mp. [mp=ti, ot, ab, tx, kw, ct, sh, hw, tn, dm, mf, dv, fx, dq, nm, kf, ox, px, rx, an, ui, sy] | 4320 |
| 6 | Besnier's prurigo.mp. [mp=ti, ot, ab, tx, kw, ct, sh, hw, tn, dm, mf, dv, fx, dq, nm, kf, ox, px, rx, an, ui, sy] | 69 |
| 7 | Besnier's.mp. [mp=ti, ot, ab, tx, kw, ct, sh, hw, tn, dm, mf, dv, fx, dq, nm, kf, ox, px, rx, an, ui, sy] | 79 |
| 8 | prurigo.mp. [mp=ti, ot, ab, tx, kw, ct, sh, hw, tn, dm, mf, dv, fx, dq, nm, kf, ox, px, rx, an, ui, sy] | 4388 |
| 9 | mycophenolate mofetil.mp. [mp=ti, ot, ab, tx, kw, ct, sh, hw, tn, dm, mf, dv, fx, dq, nm, kf, ox, px, rx, an, ui, sy] | 36906 |
| 10 | mycophenolic acid.mp. [mp=ti, ot, ab, tx, kw, ct, sh, hw, tn, dm, mf, dv, fx, dq, nm, kf, ox, px, rx, an, ui, sy] | 60657 |
| 11 | mycophenolate sodium.mp. [mp=ti, ot, ab, tx, kw, ct, sh, hw, tn, dm, mf, dv, fx, dq, nm, kf, ox, px, rx, an, ui, sy] | 1720 |
| 12 | myfortic.mp. [mp=ti, ot, ab, tx, kw, ct, sh, hw, tn, dm, mf, dv, fx, dq, nm, kf, ox, px, rx, an, ui, sy] | 907 |
| 13 | 1 or 2 or 3 or 4 or 5 or 6 or 7 or 8 | 121945 |
| 14 | 9 or 10 or 11 or 12 | 79239 |
| 15 | 13 and 14 | 934 |

**Supplementary Table 2. Predictors of good treatment outcome**

|  | Ineffective | Effective | P-value |
| --- | --- | --- | --- |
| Age | 38.2 ± 20.6 | 38.2 ± 23.6 | 0.995 |
| Pediatric (age <18 years) | 5 (17.9%) | 23 (82.1%) | 0.355 |
| Adult (age≥ 18 years) | 21 (26.6%) | 58 (73.4%) |  |
| Females | 9 (16.7%) | 45 (83.3%) | 0.138 |
| Males | 17 (27.9%) | 44 (72.1%) |  |
| Duration of AD (years) | 32 ± 21.1 | 23.4 ± 20.7 |  |
| <30 years | 5 (14.3%) | 30 (85.7%) | 0.352 |
| ≥30 years | 4 (25%) | 12 (75%) |  |
| Duration of treatment (years) | 11.8 ± 8.7 | 40.7 ± 63.8 | 0.026 |
| <1 year | 25 (27.8%) | 65 (72.2%) | 0.003 |
| ≥1 year | 0 (0%) | 25 (100%) |  |
| Failed prior treatments | 3.9 ± 1.1 | 3.4 ± 1.2 | 0.127 |

**Supplementary Table 3. Predictors of complications**

|  | No complication | Complication | P-value |
| --- | --- | --- | --- |
| Age | 35.7 ± 22.2 | 42.9 ± 23.6 | 0.124 |
| Pediatric (age <18 years) | 20 (71.4%) | 8 (28.6%) | 0.437 |
| Adult (age≥ 18 years) | 50 (63.3%) | 29 (36.7%) |  |
| Females | 49 (74.2%) | 17 (25.8%) | 0.045 |
| Males | 43 (58.1%) | 31 (41.9%) |  |
| Duration of AD (years) | 22.6 ± 20.3 | 29.5 ± 21.8 |  |
| <1 year | 25 (71.4%) | 10 (28.6%) | 0.286 |
| ≥1 year | 9 (56.3%) | 7 (43.8%) |  |
| Duration of treatment (years) | 37.2 ± 66.7 | 29.5 ± 36.2 |  |
| <1 year | 58 (63.7%) | 33 (36.3%) | 0.981 |
| ≥1 year | 16 (64%) | 9 (36%) |  |
| Failed prior treatments | 3.5 ± 1.2 | 3.6 ± 1.2 | 0.9 |

**Supplementary Table 4. Predictors of herpes infection**

|  | No infection | Herpes infection | P-value |
| --- | --- | --- | --- |
| Age | 38.1 ± 22.9 | 40.0 ± 34.0 | 0.818 |
| Pediatric (age <18 years) | 27 (96.4%) | 1(3.6%) | 0.361 |
| Adult (age≥ 18 years) | 72 (91.1%) | 7 (8.9%) |  |
| Females | 62 (93.9%) | 4 (6.1%) | 0.214 |
| Males | 65 (87.8%) | 9 (12.2%) |  |
| Duration of AD (years) | 23.8 ± 20.7 | 33.2 ± 22.2 |  |
| <30 years | 32 (91.4%) | 3 (8.5%) | 0.295 |
| ≥30 years | 13 (81.3%) | 3 (18.8%) |  |
| Duration of treatment (years) | 32.1 ± 56.9 | 61.8 ± 61.0 |  |
| <1 year | 87 (95.6%) | 4 (4.6%) | 0.01 |
| ≥1 year | 20 (80%) | 5 (20%) |  |
| Failed prior treatments | 3.5 ± 1.1 | 4.1 ± 1.7 | 0.168 |
